# Supplementary material
Source: MDPI journal article supplement (https://www.mdpi.com/2073-4344/13/6/992)
Supplement: s1 [file s1]

# Supplementary Materials

## Effect of Calcination Conditions on Co<sub>3</sub>O<sub>4</sub> Catalysts in the Total Oxidation of Toluene and Propane

Weidong Zhang <sup>1,2</sup>, Claude Descorme <sup>2</sup>, Jose Luis Valverde <sup>3</sup> and Anne Giroir-Fendler <sup>2,\*</sup>

<sup>1</sup> School of Chemistry and Chemical Engineering, Anhui Province Key Laboratory of Coal Clean Conversion and High Valued Utilization, Anhui University of Technology, Ma'anshan 243002, China; weidong.zhang@ahut.edu.cn

<sup>2</sup> University Lyon, Université Claude Bernard Lyon 1, CNRS, IRCELYON, 2 Avenue Albert Einstein, F-69622 Villeurbanne, France; claude.descorme@free.fr

<sup>3</sup> Faculty of Chemical Science and Technology, University of Castilla-La Mancha, Avenida Camilo José Cela 12, 13005 Ciudad Real, Spain; joseluis.valverde@uclm.es

\* Correspondence: anne.giroir-fendler@ircelyon.univ-lyon1.fr

**Table caption**

**Table S1.** Light-off temperatures at 10, 50 and 90% conversion ( $T_{10}$ ,  $T_{50}$  and  $T_{90}$ , respectively) of toluene/propane to  $\text{CO}_2$ .

**Schematic caption**

**Schematic S1.** Reaction temperature program used in catalytic test.

**Figure captions**

**Figure S1.** TG weight loss curve of the 80 °C dried cobalt precursor.

**Figure S2.** FTIR spectra of the cobalt precursor and the  $\text{Co}_3\text{O}_4$  catalysts calcined under different conditions.

**Figure S3.** (a) Toluene and (b) propane oxidation rate as a function of temperature over the  $\text{Co}_3\text{O}_4$  catalysts calcined under different conditions.

**Table S1.** Light-off temperatures at 10, 50 and 90% conversion ( $T_{10}$ ,  $T_{50}$  and  $T_{90}$ , respectively) of toluene/propane to  $\text{CO}_2$ .

| Catalysts | Toluene oxidation |          |          | Propane oxidation |          |          |
|-----------|-------------------|----------|----------|-------------------|----------|----------|
|           | $T_{10}$          | $T_{50}$ | $T_{90}$ | $T_{10}$          | $T_{50}$ | $T_{90}$ |
| Co-350S   | 215               | 230      | 264      | 153               | 185      | 207      |
| Co-350D   | 200               | 230      | 257      | 148               | 180      | 201      |
| Co-550S   | 229               | 238      | 256      | 175               | 214      | 248      |
| Co-550D   | 222               | 234      | 256      | 161               | 197      | 224      |

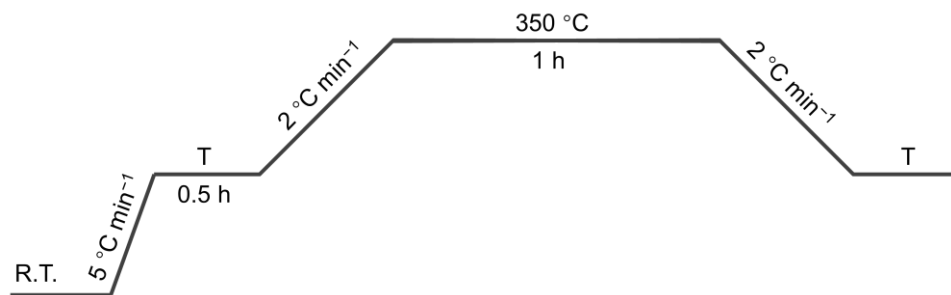

**Schematic S1.** Reaction temperature program used in catalytic test.

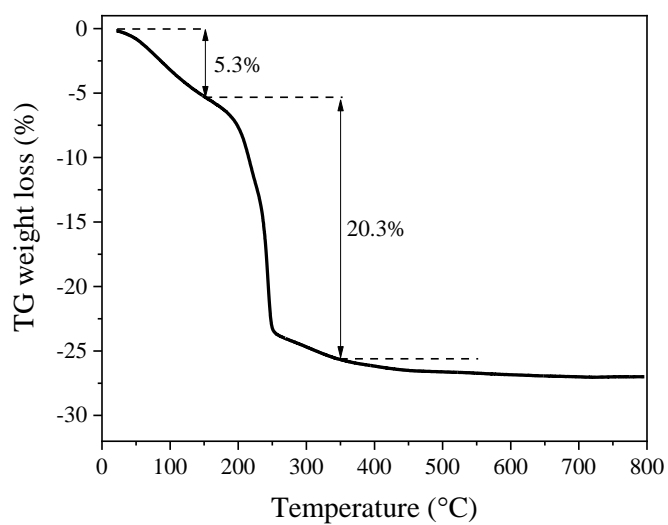

**Figure S1.** TG weight loss curve of the 80 °C dried cobalt precursor.

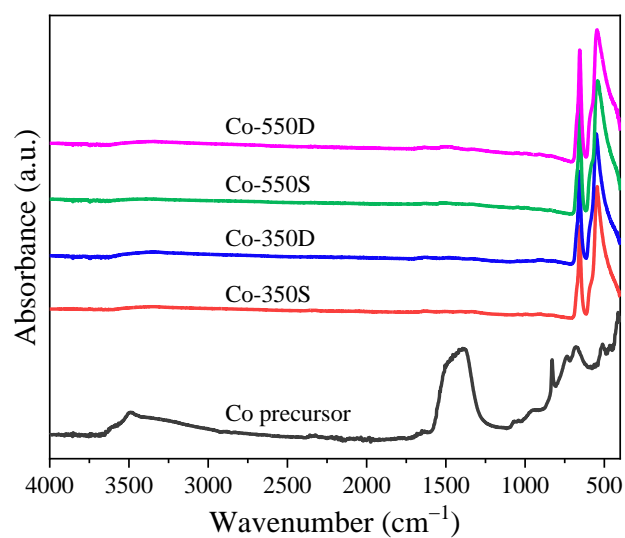

**Figure S2.** FTIR spectra of the cobalt precursor and the  $\text{Co}_3\text{O}_4$  catalysts calcined under different conditions.

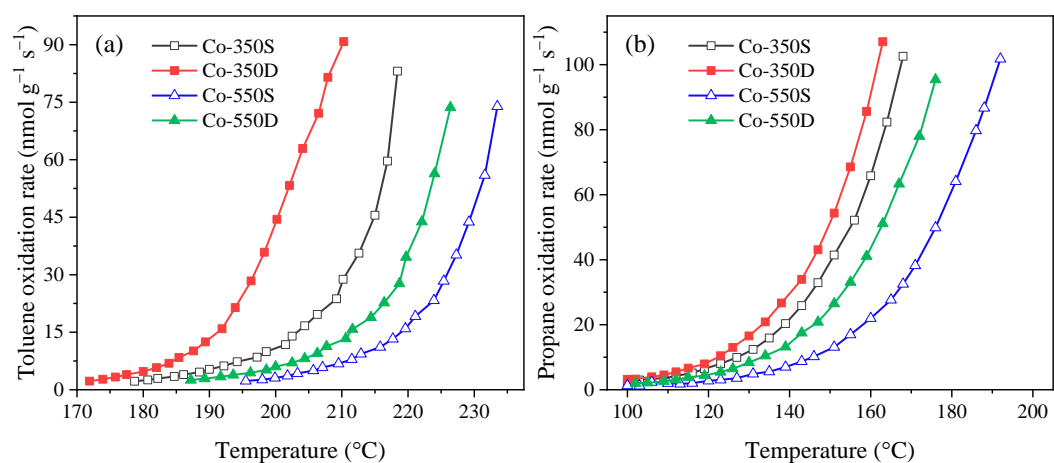

**Figure S3.** (a) Toluene and (b) propane oxidation rate as a function of temperature over the  $\text{Co}_3\text{O}_4$  catalysts calcined under different conditions.
